# Supplementary material for: Identification of Vinyl Sulfone Derivatives as EGFR Tyrosine Kinase Inhibitor: In Vitro and In Silico Studies
Source: PubMed Central journal article supplement (PMC8069501; doi:10.3390/molecules26082211), 2021-04-12
Supplement: molecules-26-02211-s001.pdf [file molecules-26-02211-s001.pdf]

# Supplementary Information

## Identification of Vinyl Sulfone Derivatives as EGFR Tyrosine Kinase Inhibitor: In Vitro and In Silico Studies

Thitinan Aiebchun <sup>1</sup>, Panupong Mahalapbutr <sup>2</sup>, Atima Auepattanapong <sup>3</sup>, Onnicha Khaikate <sup>3</sup>, Supaphorn Seetaha <sup>4</sup>, Lueacha Tabtimmai <sup>5</sup>, Chutima Kuhakarn <sup>3</sup>, Kiattawee Choowongkomon <sup>4,\*</sup> and Thanyada Rungrotmongkol <sup>1,6,\*</sup>

<sup>1</sup> Biocatalyst and Environmental Biotechnology Research Unit, Department of Biochemistry, Faculty of Science, Chulalongkorn University, Bangkok, Thailand; thitinan1906@gmail.com

<sup>2</sup> Department of Biochemistry, Faculty of Medicine, Khon Kaen University, Khon Kaen 40002, Thailand; panupma@kku.ac.th

<sup>3</sup> Department of Chemistry and Center of Excellence for Innovation in Chemistry (PERCH-CIC), Faculty of Science, Mahidol University, Bangkok, Thailand; iceatima.12@gmail.com (A.A.); onnicha.khai@gmail.com (O.K.); chutima.kon@mahidol.ac.th (C.K.)

<sup>4</sup> Department of Biochemistry, Faculty of Science, Kasetsart University, Chatuchak, Bangkok 10900, Thailand; supaporn.se@ku.th

<sup>5</sup> Department of Biotechnology, Faculty of Applied Science, King Mongkut's University of Technology of North Bangkok, Bangkok, Thailand; Lueacha.t@sci.kmutnb.ac.th

<sup>6</sup> Program in Bioinformatics and Computational Biology, Faculty of Science, Chulalongkorn University, Bangkok, Thailand

\* Corresponding: kiattawee.c@ku.th (K.C.); t.rungrotmongkol@gmail.com (T.R.); Tel: +66-2218-5426 (T.R.); Fax: +66-2218-5418 (T.R.)

## Table of Contents

---

|                                                                                                                        |    |
|------------------------------------------------------------------------------------------------------------------------|----|
| 1. <b>Figure S1.</b> Superimposition of ligands between X-ray structure and CDOCKER docking                            | S3 |
| 2. <b>Figure S2.</b> Binding pose between VF16 and known drug within EGFR-TK                                           | S3 |
| 3. <b>Figure S3.</b> The IC <sub>50</sub> curves of kinase inhibitory activity of VF16 against EGFR-TK, JAK3, and HER2 | S4 |

---

## 1. Figure S1

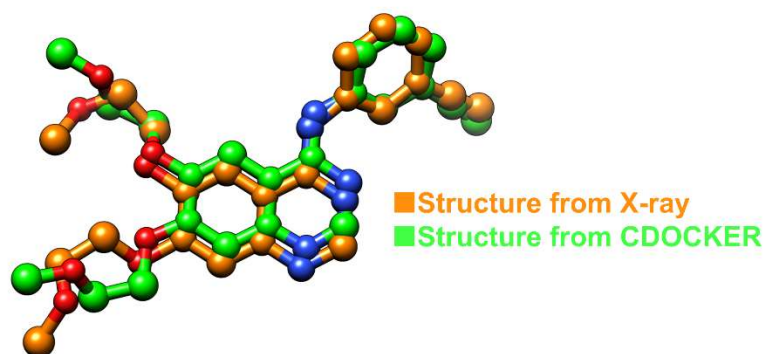

RMSD = 1.90 Å

**Figure S1.** Superimposition of ligands between X-ray structure (orange) and CDOCKER docking (green).

## 2. Figure S2

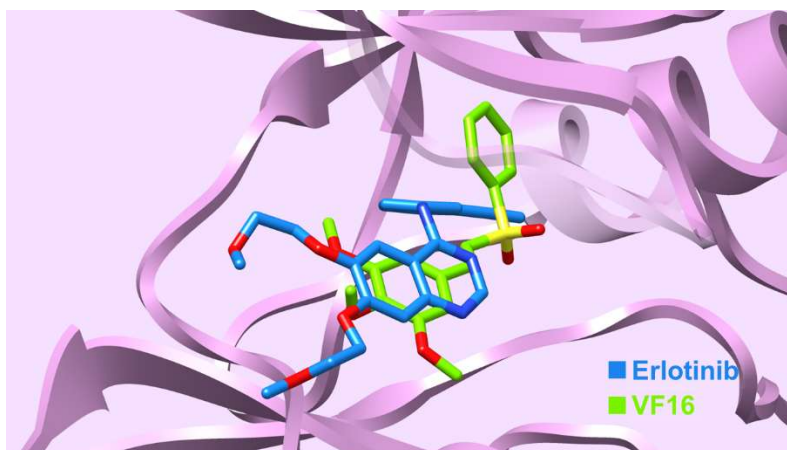

**Figure S2.** Binding pose between VF16 and known drug within EGFR-TK.

### 3. Figure S3

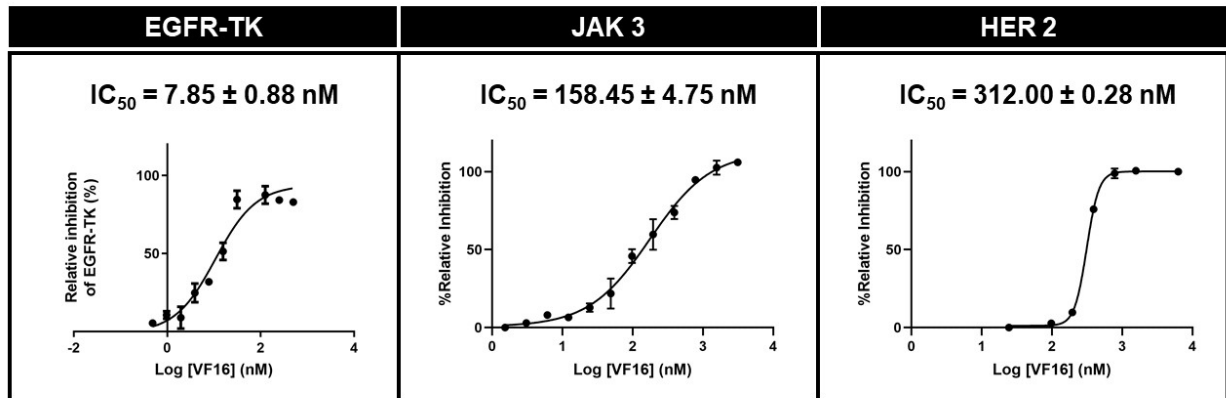

**Figure S3.** The  $IC_{50}$  curves of kinase inhibitory activity of VF16 against EGFR-TK, JAK3, and HER2.
